# Supplementary material for: Synthesis and multifunctional sensing ability of axially chiral tetranuclear europium clusters
Source: Royal Society of Chemistry journal article supplement (doi:10.1039/d1ce01554k), 2022-01-01
Supplement: d1ce01554k1.pdf [file d1ce01554k1.pdf]

## Supplementary Information

### **Synthesis and multifunctional sensing of axially chiral tetranuclear europium clusters**

Dongxu Cui,<sup>1a</sup> Honglei Zhao,<sup>1a</sup> Junning Kou,<sup>a</sup> Chunyi Sun,<sup>\*a</sup> Xinlong Wang<sup>\*a</sup> and Zhongmin Su<sup>a</sup>

## Chemical sensing

The fluorescence quenching was analyzed using the Stern-Volmer equations:

$$I_0/I = K_{sv}[Q]$$

where  $I_0$  and  $I$  are the fluorescence intensity without analyte and after the addition of analyte, respectively,  $K_{sv}$  is the Stern-Volmer quenching constant and  $[Q]$  is the concentration of analyte. The quenching percentage was calculated using the equation as follows:

$$\text{Fluorescence quenching \%} = (1 - I/I_0) \times 100 \%$$

where  $I_0$  and  $I$  are the fluorescence intensity without analyte and after the addition of analyte.

The limit of detection concentration (LOD) was calculated according to the formula:

$$\text{LOD} = 3\delta/K_{sv}$$

and  $\delta$  is the standard deviation of the detection method.

## Results and Discussion

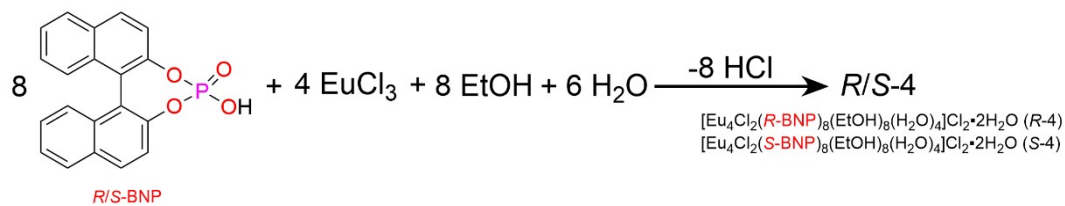

Fig. S1 Synthesis and chiral transfer processes of *R*-4 and *S*-4.

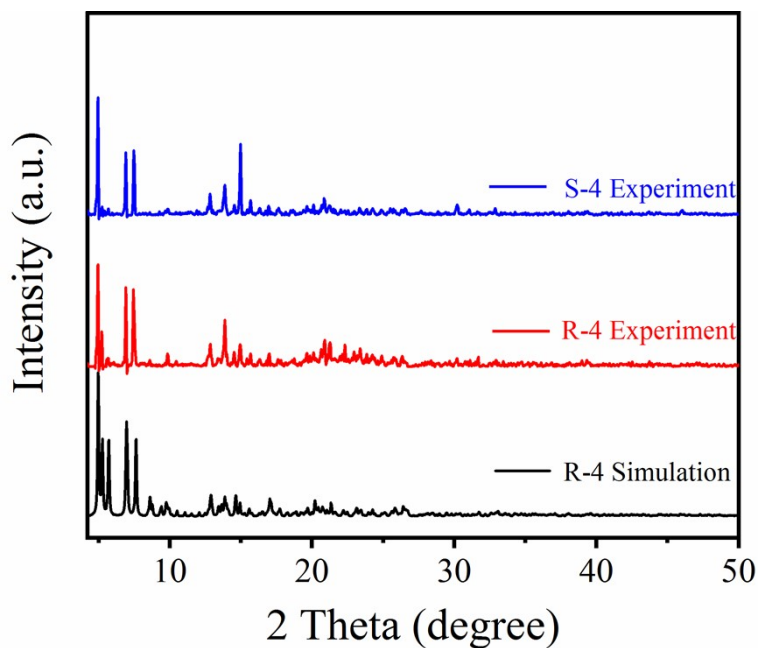

Fig. S2 Simulated and experimentally measured PXRD of *R*-4 and *S*-4.

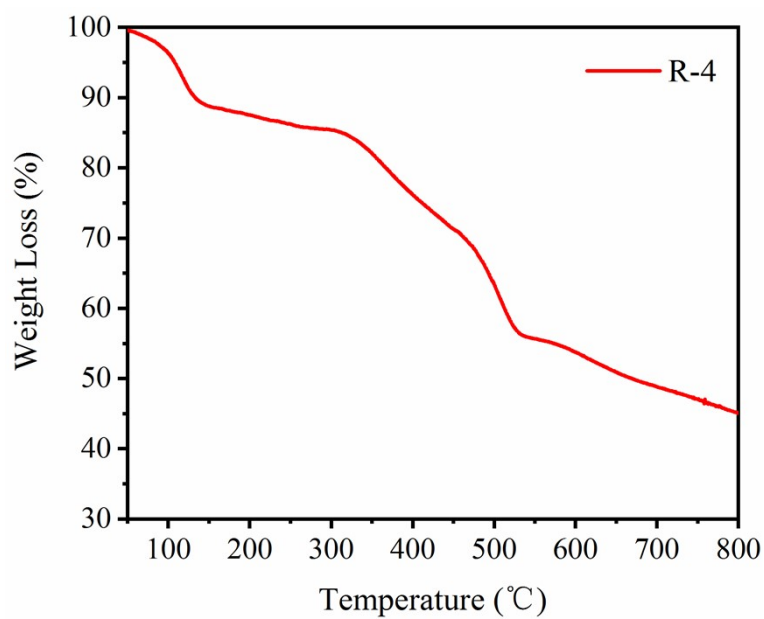

Fig. S3 Thermogravimetric analysis of *R*-4 in nitrogen atmosphere.

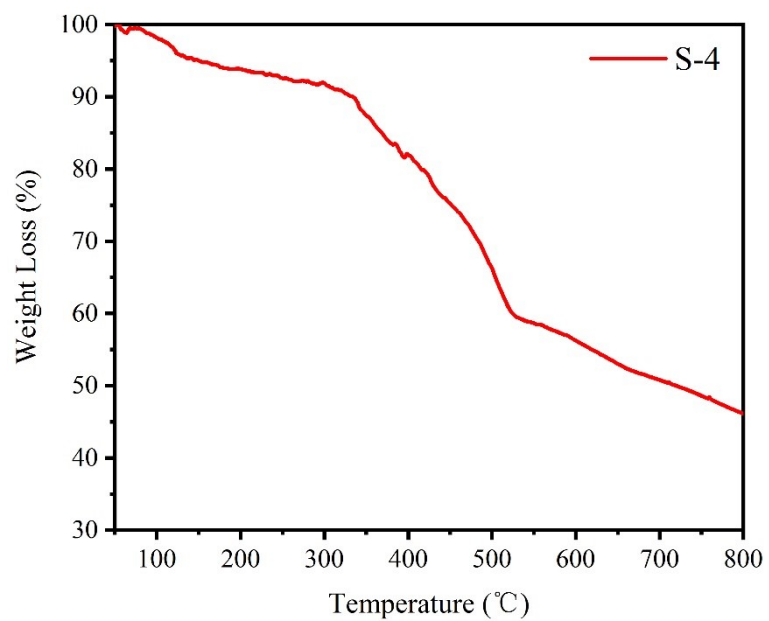

Fig. S4 Thermogravimetric analysis of S-4 in nitrogen atmosphere.

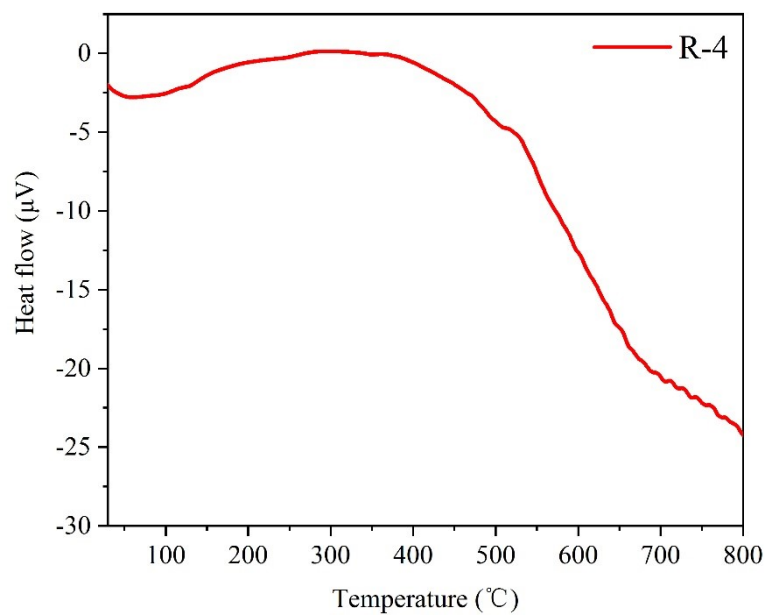

Fig. S5 DTA of R-4 in nitrogen atmosphere.

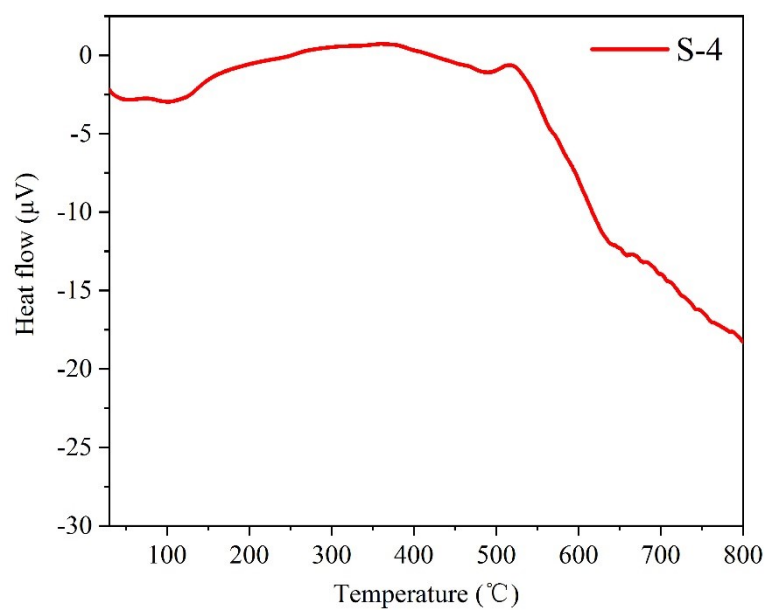

Fig. S6 DTA of S-4 in nitrogen atmosphere.

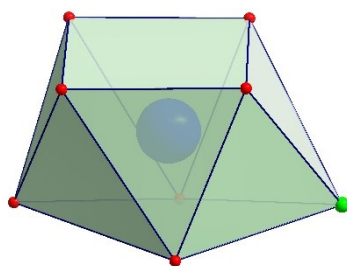

Fig. S7 The coordination mode of Eu<sup>3+</sup> ions in R-4.

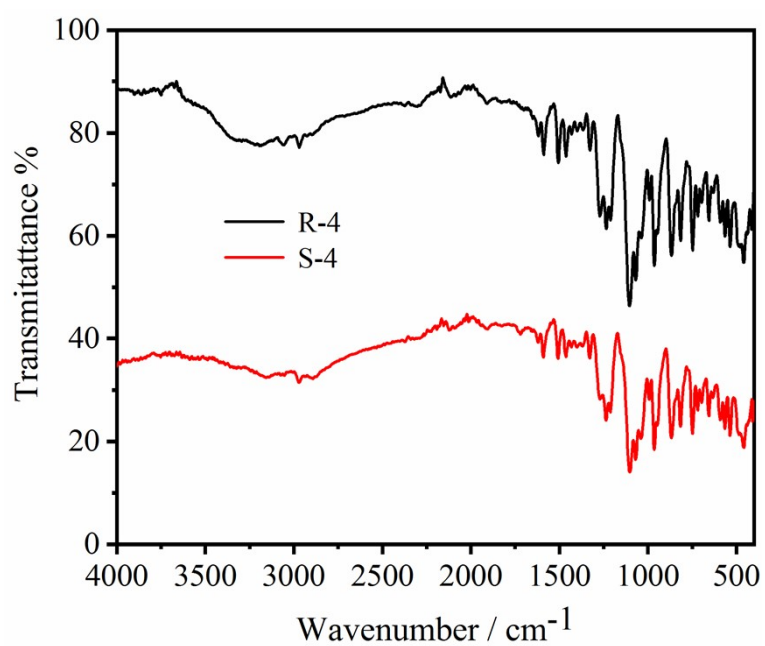

Fig. S8 FTIR spectrum (KBr pellets) of R-4 and S-4.

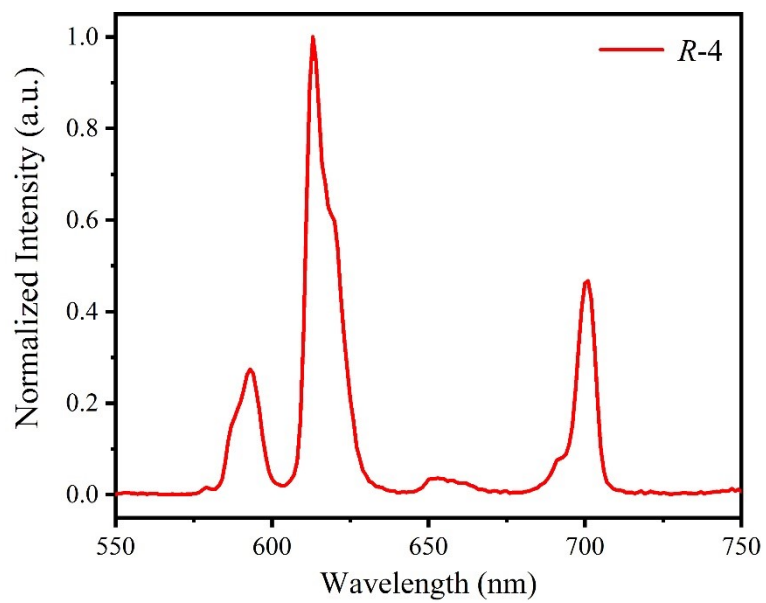

**Fig. S9** The emission spectra of **R-4** ( $\lambda_{\text{ex}}=323$  nm).

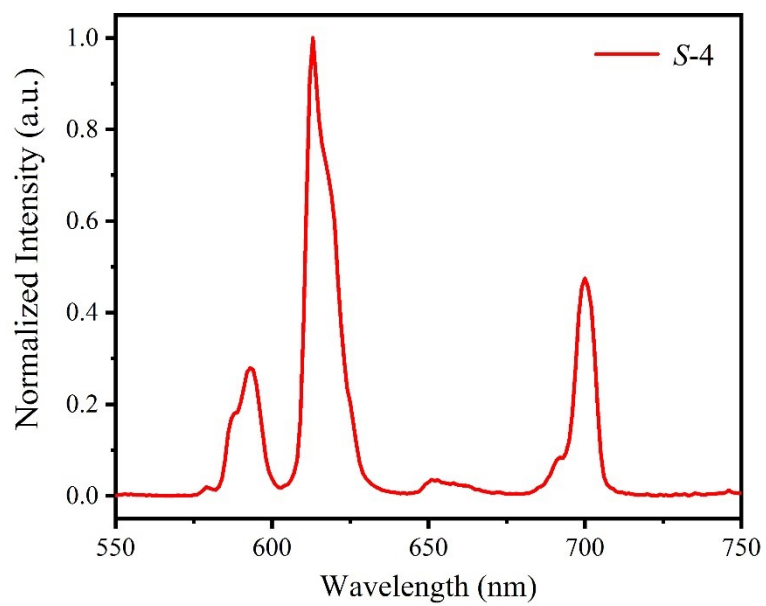

**Fig. S10** The emission spectra of **S-4** ( $\lambda_{\text{ex}}=323$  nm).

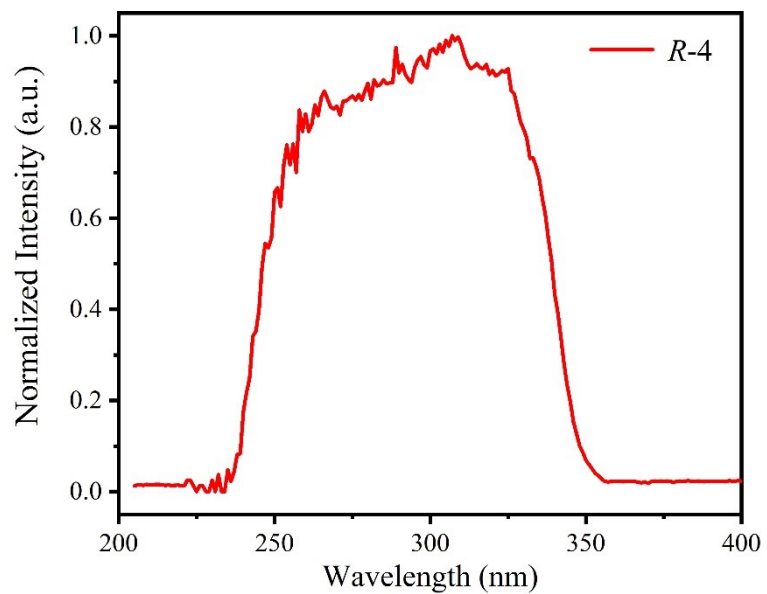

**Fig. S11** The excitation spectra of **R-4**.

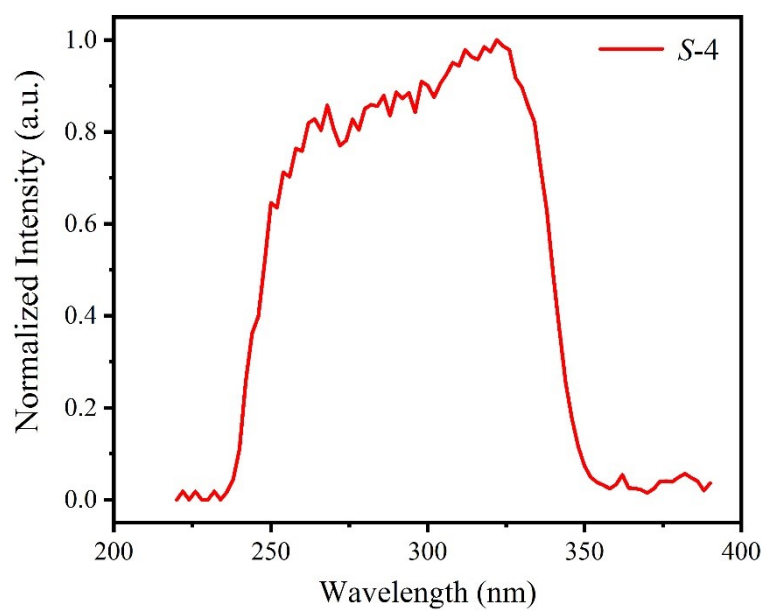

**Fig. S12** The excitation spectra of **S-4**.

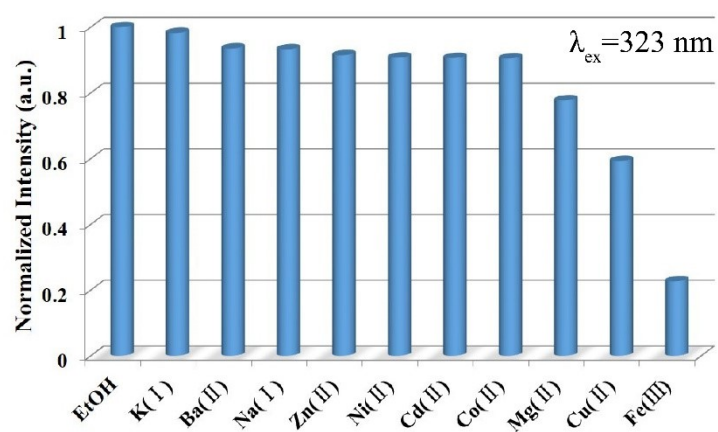

Fig. S13 Fluorescence response of *R-4* to different metal cations.

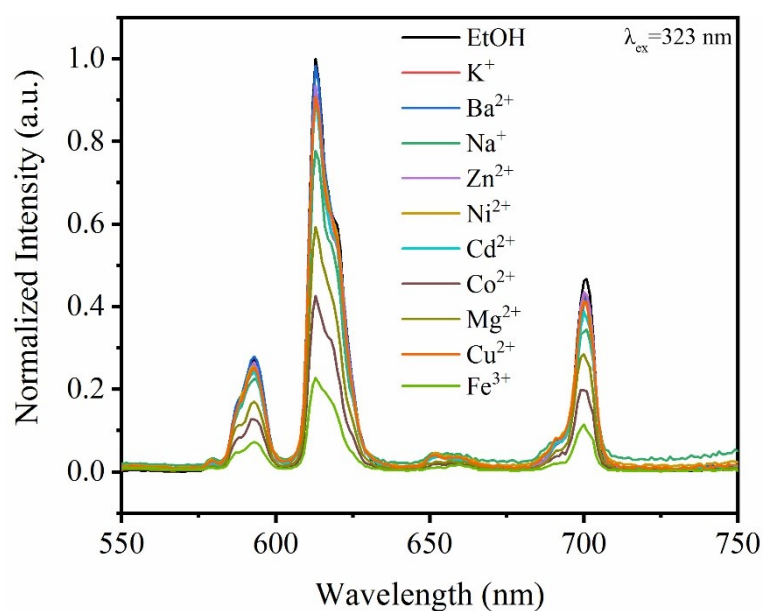

Fig. S14 Fluorescence spectra of *R-4* in different metal cation solutions.

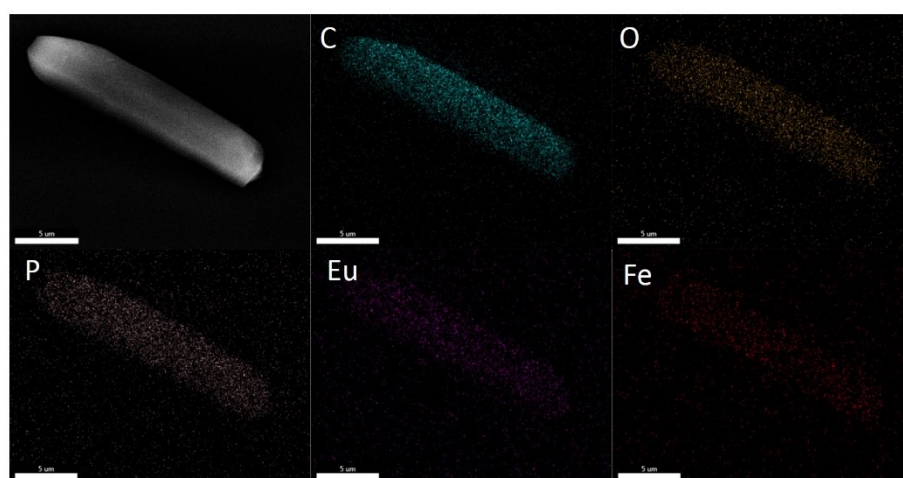

Fig. S15 TSM and mapping of *R-4* after adsorption of  $Fe^{3+}$  ions.



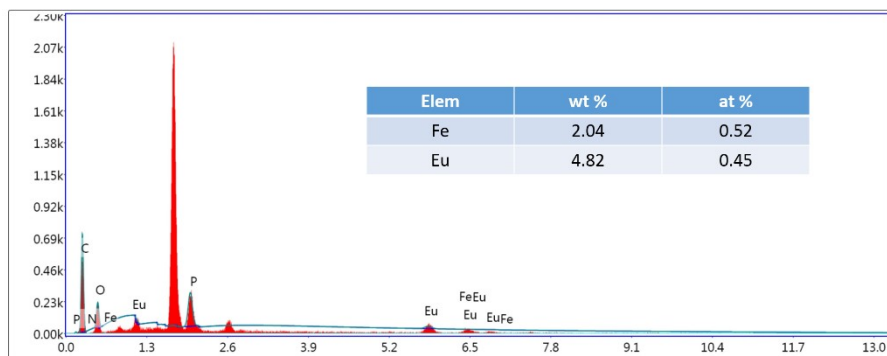

Fig. S16 EDS of *R-4* after adsorption of  $\text{Fe}^{3+}$  ions.

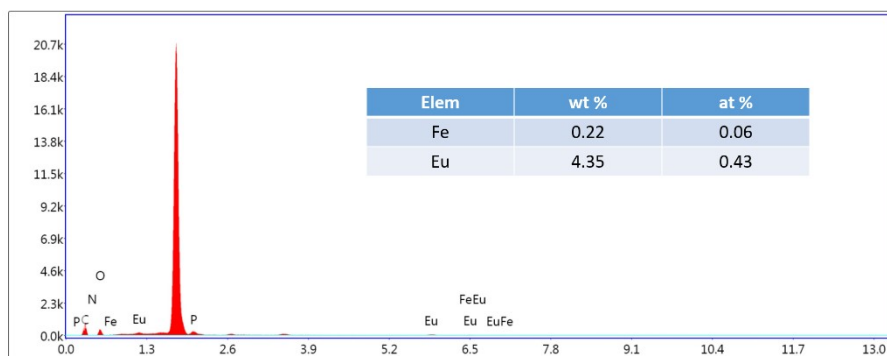

Fig. S17 EDS of *R-4* after adsorption of  $\text{Fe}^{3+}$  ions and washing.

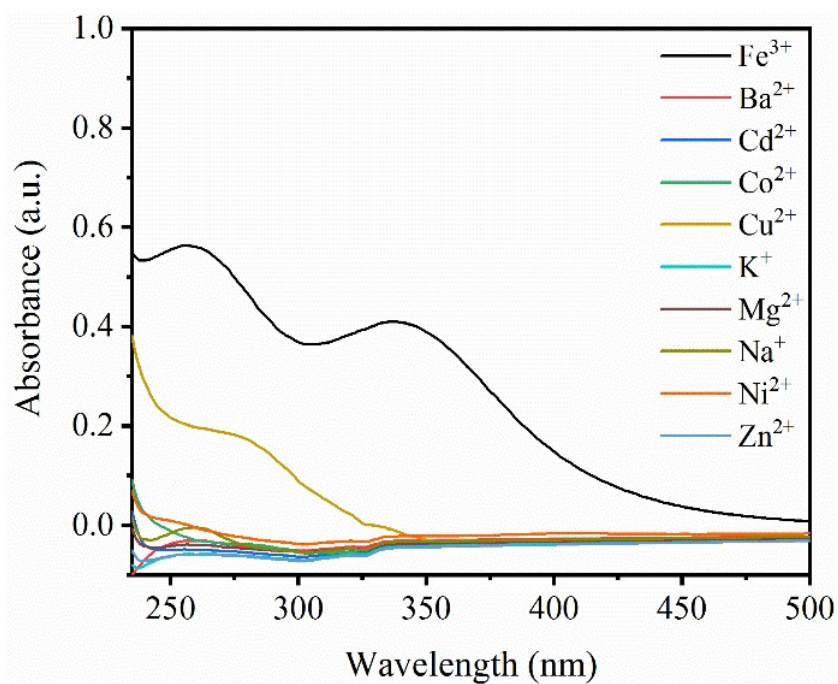

Fig. S18 UV absorption spectra of metal cations in ethanol.

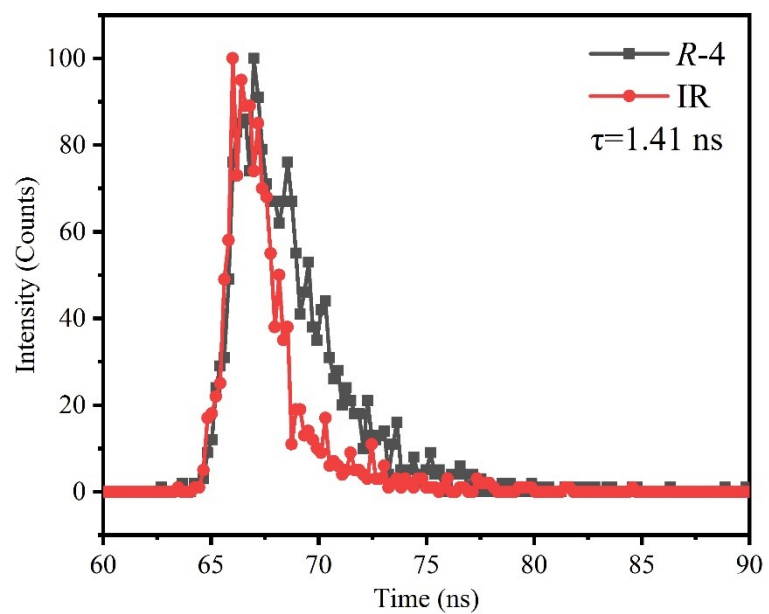

Fig. S19 Lifetime decay curves of *R-4* ( $\lambda_{\text{ex}}=323$  nm).

**Table S1.** The Crystallographic data for **R-4** and **S-4**.

| Compound                                 | R-4                                                                                              | S-4                                                                                              |
|------------------------------------------|--------------------------------------------------------------------------------------------------|--------------------------------------------------------------------------------------------------|
| Empirical formula                        | C <sub>176</sub> H <sub>158</sub> Cl <sub>4</sub> Eu <sub>4</sub> O <sub>51</sub> P <sub>8</sub> | C <sub>176</sub> H <sub>158</sub> Cl <sub>4</sub> Eu <sub>4</sub> O <sub>51</sub> P <sub>8</sub> |
| Formula weight                           | 4086.41                                                                                          | 4086.41                                                                                          |
| Temperature/K                            | 286.02                                                                                           | 295.0                                                                                            |
| Crystal system                           | Triclinic                                                                                        | Triclinic                                                                                        |
| Space group                              | P1                                                                                               | P1                                                                                               |
| <i>a</i> /Å                              | 13.7446(5)                                                                                       | 13.7311(9)                                                                                       |
| <i>b</i> /Å                              | 18.4533(7)                                                                                       | 18.3631(12)                                                                                      |
| <i>c</i> /Å                              | 20.1499(7)                                                                                       | 20.1893(13)                                                                                      |
| $\alpha$ /°                              | 108.815(2)                                                                                       | 108.665(3)                                                                                       |
| $\beta$ /°                               | 107.500(2)                                                                                       | 107.697(3)                                                                                       |
| $\gamma$ /°                              | 97.438(2)                                                                                        | 97.375(3)                                                                                        |
| Volume/Å <sup>3</sup>                    | 4466.2(3)                                                                                        | 4448.8(5)                                                                                        |
| <i>Z</i>                                 | 1                                                                                                | 1                                                                                                |
| $\rho_{\text{calc}}$ /cm <sup>3</sup>    | 1.378                                                                                            | 1.427                                                                                            |
| $\mu$ /mm <sup>-1</sup>                  | 11.457                                                                                           | 11.519                                                                                           |
| <i>F</i> (000)                           | 1848.0                                                                                           | 1917.0                                                                                           |
| Radiation                                | Cu K $\alpha$<br>( $\lambda$ = 1.54178)                                                          | Cu K $\alpha$<br>( $\lambda$ = 1.54178)                                                          |
| Reflections collected                    | 40098                                                                                            | 63762                                                                                            |
| Independent reflections                  | 13294                                                                                            | 13352                                                                                            |
| Data/restraints/parameters               | 13294/5207/1992                                                                                  | 13352/5225/2024                                                                                  |
| Goodness-of-fit on <i>F</i> <sup>2</sup> | 1.036                                                                                            | 1.024                                                                                            |
| Final R indexes                          | R <sub>1</sub> = 0.0772,                                                                         | R <sub>1</sub> = 0.0813,                                                                         |
| [ <i>I</i> >= 2 $\sigma$ ( <i>I</i> )]   | wR <sub>2</sub> = 0.1878                                                                         | wR <sub>2</sub> = 0.1808                                                                         |
| Final R indexes                          | R <sub>1</sub> = 0.1067,                                                                         | R <sub>1</sub> = 0.1078,                                                                         |
| [all data]                               | wR <sub>2</sub> = 0.2071                                                                         | wR <sub>2</sub> = 0.1985                                                                         |
| Largest diff. peak/hole/eÅ <sup>-3</sup> | 0.84/-1.09                                                                                       | 1.84/-0.80                                                                                       |
| Flack parameter                          | 0.153(6)                                                                                         | 0.171(5)                                                                                         |
